# Supplementary material
Source: Springer Nature journal article supplement (https://www.springermedizin.de/resource/supplementary/13058_2005_1349_MOESM3_ESM.pdf/9698916)

# S-3: MCF7 Karyogram

red and green lines represent +1.0 and -1.0 log2 ratio scale references respectively

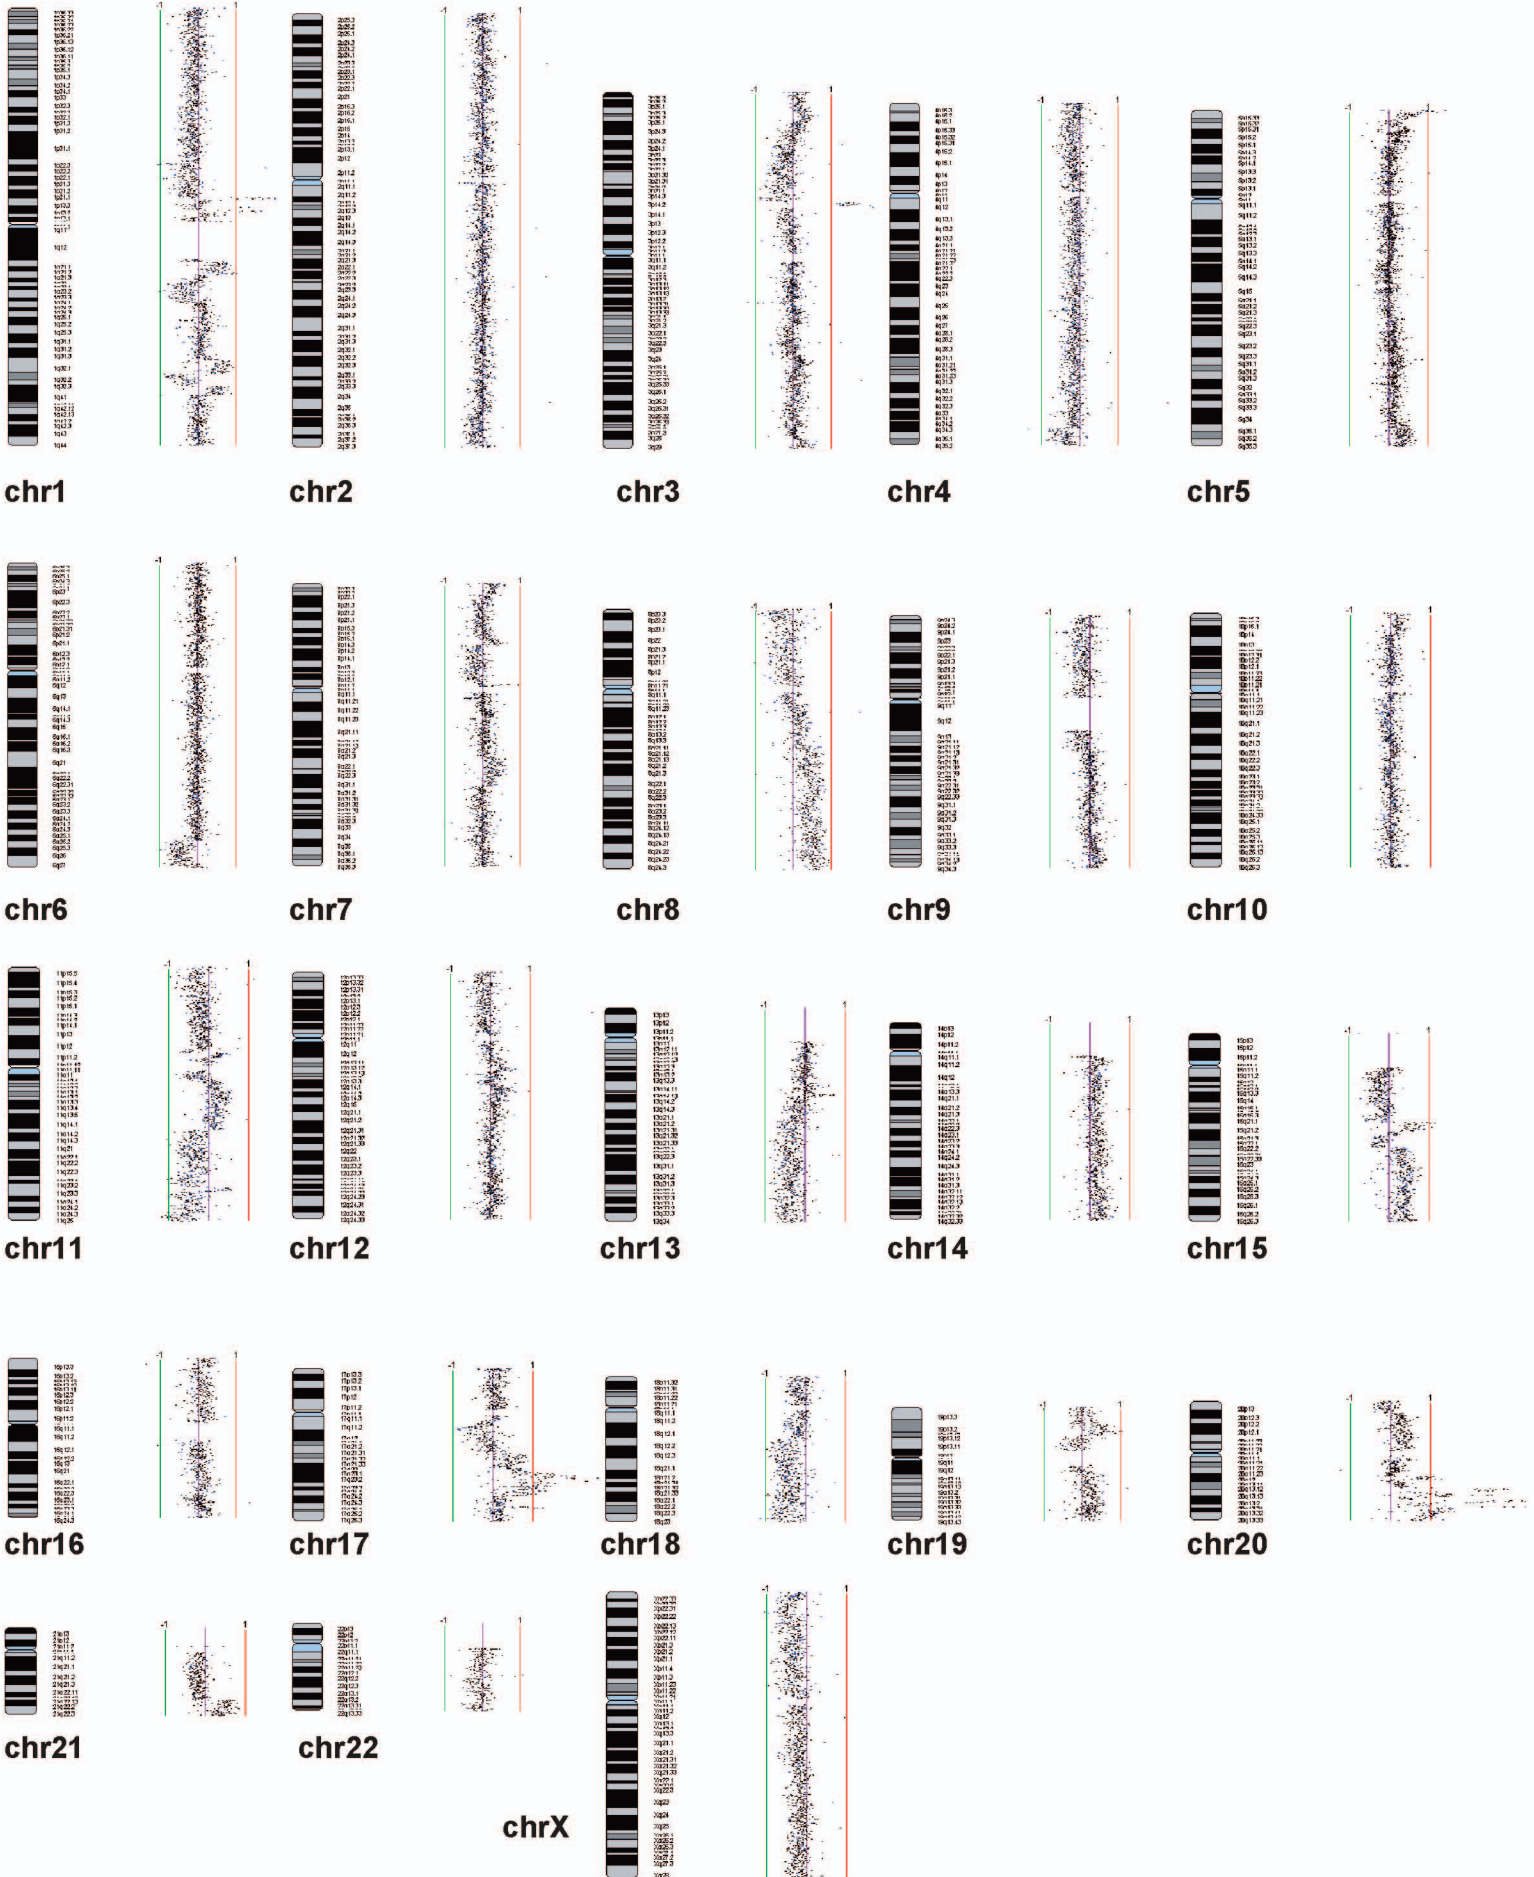

Supplement: MOESM3 [file 9698916]
